# Supplementary material for: Acupuncture for Functional Dyspepsia: What Strength Does It Have? A Systematic Review and Meta-Analysis of Randomized Controlled Trials
Source: PubMed Central journal article supplement (PMC5227170; doi:10.1155/2016/3862916), 2016-12-29
Supplement: 3862916.f1.pdf [file 3862916.f1.pdf]

## **S1 Appendix. Search strategy**

### **1. PUBMED**

Search terms : (("acupuncture"[MeSH Terms] OR "acupuncture"[All Fields] OR "acupuncture therapy"[MeSH Terms] OR ("acupuncture"[All Fields] AND "therapy"[All Fields]) OR "acupuncture therapy"[All Fields]) OR "acupuncture therapy"[MeSH Terms] OR ("acupuncture"[All Fields] AND "treatment"[All Fields]) OR "acupuncture treatment"[All Fields]) OR ("electroacupuncture"[MeSH Terms] OR "electroacupuncture"[All Fields])) AND ("dyspepsia"[MeSH Terms] OR "dyspepsia"[All Fields] OR "functional dyspepsia"[MeSH Terms] OR "functional dyspepsia"[All Fields] OR "indigestion"[All Fields] OR "indigestions"[All Fields] OR "distention"[All Fields] OR "non-ulcer dyspepsia"[All Fields])

### **2. EMBASE**

Search terms : ('acupuncture'/exp OR acupuncture OR 'electroacupuncture'/exp OR electroacupuncture OR 'acupuncture therapy'/exp OR acupuncture therapy OR 'acupuncture treatment'/exp OR acupuncture treatment ) AND ('dyspepsia'/exp OR dyspepsia OR 'functional dyspepsia'/exp OR functional dyspepsia OR indigestion OR indigestions OR distention OR non-ulcer dyspepsia)

### **3. Cochrane Central Register of controlled trials**

Search terms : (acupuncture OR electroacupuncture) AND (dyspepsia OR functional dyspepsia OR indigestion OR distention)

### **4. China National Knowledge Infrastructure (CNKI)**

Search terms:(针刺 OR 电针 OR 针灸 OR 针灸疗法 OR 针刺疗法) AND (消化不良 OR 功能性消化不良 OR 积滞 OR 痞满 OR 胃脘痛 OR 非溃疡性消化不良)

### **5. Chinese Biomedical Database (CBM)**

Search terms:(针刺 OR 电针 OR 针灸 OR 针灸疗法 OR 针刺疗法) AND (消化不良 OR 功能性消化不良 OR 积滞 OR 痞满 OR 胃脘痛 OR 非溃疡性消化不良)

### **6. Chinese VIP information (VIP)**

Search terms:(针刺 OR 电针 OR 针灸 OR 针灸疗法 OR 针刺疗法) AND (消化不良 OR 功能性消化不良 OR 积滞 OR 痞满 OR 胃脘痛 OR 非溃疡性消化不良)

### **7. Wanfang Data and Wanfang Dissertation Database**

Search terms:(针刺 OR 电针 OR 针灸 OR 针灸疗法 OR 针刺疗法) AND (消化不良 OR 功能性消化不良 OR 积滞 OR 痞满 OR 胃脘痛 OR 非溃疡性消化不良)

## S1 Fig. GRADE

### Summary of findings:

#### Acupuncture compared to Sham acupuncture for functional dyspepsia

**Patient or population:** functional dyspepsia

**Setting:** hospital inpatients and outpatients

**Intervention:** Acupuncture

**Comparison:** Sham acupuncture

| Outcomes                                                                                                   | Anticipated absolute effects* (95% CI)                  |                                                                                                                                          | Relative effect (95% CI) | N <sub>e</sub> of participants (studies) | Quality of the evidence (GRADE) | Comments |
|------------------------------------------------------------------------------------------------------------|---------------------------------------------------------|------------------------------------------------------------------------------------------------------------------------------------------|--------------------------|------------------------------------------|---------------------------------|----------|
|                                                                                                            | Risk with Sham acupuncture                              | Risk with Acupuncture                                                                                                                    |                          |                                          |                                 |          |
| Nepean Dyspepsia Symptom Index after 2-week treatment (NDSI)                                               |                                                         | The mean nepean Dyspepsia Symptom Index after 2-week treatment in the intervention group was 14.7 more (3.41 fewer to 32.81 more)        | -                        | 129 (2 RCTs)                             | ⊕⊕○○<br>LOW <sup>1,2</sup>      |          |
| Nepean Dyspepsia Symptom Index after 4-week treatment (NDSI) follow up: range 1 months to 5 months         |                                                         | The mean nepean Dyspepsia Symptom Index after 4-week treatment in the intervention group was 20.91 more (6.55 more to 35.26 more)        | -                        | 139 (2 RCTs)                             | ⊕⊕○○<br>LOW <sup>1,3</sup>      |          |
| Nepean Dyspepsia Life Quality Index after 2-week treatment (NDLQI)                                         |                                                         | The mean nepean Dyspepsia Life Quality Index after 2-week treatment in the intervention group was 10.57 more (1.2 more to 19.94 more)    | -                        | 129 (2 RCTs)                             | ⊕⊕○○<br>LOW <sup>1,2</sup>      |          |
| Nepean Dyspepsia Life Quality Index after 4 weeks' treatment (NDLQI) follow up: range 1 months to 5 months |                                                         | The mean nepean Dyspepsia Life Quality Index after 4 weeks' treatment in the intervention group was 10.49 more (0.24 more to 20.74 more) | -                        | 139 (2 RCTs)                             | ⊕⊕○○<br>LOW <sup>1,3</sup>      |          |
| SF-36 after 2 week's treatment (SF-36 scale) follow up: mean 1 months                                      | The mean SF-36 after 2 week's treatment was <b>1.65</b> | The mean SF-36 after 2 week's treatment in the intervention group was 21.3 more (18.53 more to 24.07 more)                               | -                        | 61 (1 RCT)                               | ⊕⊕○○<br>LOW <sup>1</sup>        |          |

|                                                                                  |                                                                                                          |   |                 |                            |
|----------------------------------------------------------------------------------|----------------------------------------------------------------------------------------------------------|---|-----------------|----------------------------|
| SF-36 after 4-week treatment (SF-36 scale) follow up: range 1 months to 3 months | The mean SF-36 after 4-week treatment in the intervention group was 12.61 more (9.21 more to 16.01 more) | - | 133<br>(2 RCTs) | ⊕⊕○○<br>LOW <sup>1,4</sup> |
|----------------------------------------------------------------------------------|----------------------------------------------------------------------------------------------------------|---|-----------------|----------------------------|

\*The risk in the intervention group (and its 95% confidence interval) is based on the assumed risk in the comparison group and the relative effect of the intervention (and its 95% CI).

CI: Confidence interval; MD: Mean difference

**GRADE Working Group grades of evidence**

**High quality:** We are very confident that the true effect lies close to that of the estimate of the effect

**Moderate quality:** We are moderately confident in the effect estimate: The true effect is likely to be close to the estimate of the effect, but there is a possibility that it is substantially different

**Low quality:** Our confidence in the effect estimate is limited: The true effect may be substantially different from the estimate of the effect

**Very low quality:** We have very little confidence in the effect estimate: The true effect is likely to be substantially different from the estimate of effect

1. High risk of allocation concealment and/or blinding approach
2. Inconsistent results between RCTs
3. Incomplete reporting data
4. Reasons of drop-outs largely relevant with intervention

**Summary of findings:**

**Acupuncture compared to Medication for functional dyspepsia**

**Patient or population:** functional dyspepsia

**Setting:** hospital inpatients and outpatients

**Intervention:** Acupuncture

**Comparison:** Medication

| Outcomes                                                                                                          | Anticipated absolute effects* (95% CI) |                                                                                                                 | Relative effect (95% CI) | № of participants (studies) | Quality of the evidence (GRADE) | Comments |
|-------------------------------------------------------------------------------------------------------------------|----------------------------------------|-----------------------------------------------------------------------------------------------------------------|--------------------------|-----------------------------|---------------------------------|----------|
|                                                                                                                   | Risk with Medication                   | Risk with Acupuncture                                                                                           |                          |                             |                                 |          |
| Nepean Dyspepsia Life Quality Index (NDLQI)                                                                       |                                        | The mean nepean Dyspepsia Life Quality Index in the intervention group was 11.71 more (8.73 more to 14.69 more) | -                        | 164 (2 RCTs)                | ⊕⊕○○<br>LOW <sup>1,2</sup>      |          |
| Symptom scores-total assessed with: total scores of four major symptoms with a range from 0-3 points respectively |                                        | The mean symptom scores-total in the intervention group was 1.31 more (0.55 more to 2.07 more)                  | -                        | 202 (3 RCTs)                | ⊕⊕○○<br>LOW <sup>1</sup>        |          |
| Symptom scores-Postprandial fullness                                                                              |                                        | The mean symptom scores-Postprandial fullness in the intervention group was 0.32 more (0.02 more to 0.61 more)  | -                        | 284 (2 RCTs)                | ⊕⊕○○<br>LOW <sup>1</sup>        |          |
| Symptom scores-Early satiation                                                                                    |                                        | The mean symptom scores-Early satiation in the intervention group was 0.31 more (0.16 more to 0.46 more)        | -                        | 284 (2 RCTs)                | ⊕⊕○○<br>LOW <sup>1</sup>        |          |
| Symptom scores-Epigastric pain                                                                                    |                                        | The mean symptom scores-Epigastric pain in the intervention group was 0.14 more (0.1 fewer to 0.37 more)        | -                        | 284 (2 RCTs)                | ⊕⊕○○<br>LOW <sup>1,3</sup>      |          |
| Symptom scores-Epigastric burning                                                                                 |                                        | The mean symptom scores-Epigastric burning in the intervention group was 0.08 fewer (0.21 fewer to 0.06 more)   | -                        | 284 (2 RCTs)                | ⊕⊕○○<br>LOW <sup>1,3</sup>      |          |
| SF-36                                                                                                             |                                        | The mean SF-36 in the intervention group was 10.2 more (5.79 more to 14.6 more)                                 | -                        | 157 (3 RCTs)                | ⊕⊕○○<br>LOW <sup>1,4</sup>      |          |

\*The risk in the intervention group (and its 95% confidence interval) is based on the assumed risk in the comparison group and the relative effect of the intervention (and its 95% CI).

CI: Confidence interval; MD: Mean difference

**GRADE Working Group grades of evidence**

**High quality:** We are very confident that the true effect lies close to that of the estimate of the effect

**Moderate quality:** We are moderately confident in the effect estimate: The true effect is likely to be close to the estimate of the effect, but there is a possibility that it is substantially different

**Low quality:** Our confidence in the effect estimate is limited: The true effect may be substantially different from the estimate of the effect

**Very low quality:** We have very little confidence in the effect estimate: The true effect is likely to be substantially different from the estimate of effect

1. High/Unclear risk of bias in allocation concealment and blinding
2. Inclusion criteria of trial was lack of authority
3. Inconsistent reporting results
4. Incomplete reporting data

**S1 Table. Risk of bias assessment and Jadad scores**

| Study                     | Random Sequence Generation | Allocation Concealment                             | Blinding of Participants and Personnel | Blinding of Outcome Assessment                             | Incomplete Outcome Data                                                                                                                                                                                    | Selective Reporting             | Other bias | Jadad Score |
|---------------------------|----------------------------|----------------------------------------------------|----------------------------------------|------------------------------------------------------------|------------------------------------------------------------------------------------------------------------------------------------------------------------------------------------------------------------|---------------------------------|------------|-------------|
| Chen 2013 <sup>[40]</sup> | L*: Random number table    | H*                                                 | U*                                     | U                                                          | U                                                                                                                                                                                                          | L                               | U          | 2           |
| Hu 2012 <sup>[41]</sup>   | L: Random number table     | H                                                  | U                                      | U                                                          | U: 2/34 missing from acupuncture group without any probable reason reported                                                                                                                                | H: Incomplete data of follow-up | U          | 3           |
| Jin 2011 <sup>[42]</sup>  | L: Random number table     | L: Sequentially numbered, opaque, sealed envelopes | L: Patients were blinded               | L: Outcome assessors and statistical analysts were blinded | H: 2/28 missing from acupuncture group (1 for “lack of efficacy”); 2/28 missing from sham-acupuncture group (both for “lack of efficacy”); reasons of missing was largely relevant with acupuncture method | L                               | U          | 6           |
| Li 2014 <sup>[43]</sup>   | L: Central Randomization   | L: Central Allocation                              | U                                      | U                                                          | U                                                                                                                                                                                                          | L                               | U          | 4           |
| Liu 2015 <sup>[44]</sup>  | L: Random number table     | H                                                  | U                                      | U                                                          | U                                                                                                                                                                                                          | H: Incomplete data of follow-up | U          | 2           |
| Ma 2014 <sup>[45]</sup>   | L: Excel sheet             | H                                                  | U                                      | U                                                          | L: 3/35 missing from acupuncture group (one for fainting during acupuncture); 6/35 missing from sham-acupuncture group                                                                                     | L                               | U          | 3           |

S1 Table CONT.

| Study                     | Random Sequence Generation           | Allocation Concealment                                    | Blinding of Participants and Personnel | Blinding of Outcome Assessment                | Incomplete Outcome Data                                                                                                                                   | Selective Reporting             | Other bias                                                                                            | Jadad Score |
|---------------------------|--------------------------------------|-----------------------------------------------------------|----------------------------------------|-----------------------------------------------|-----------------------------------------------------------------------------------------------------------------------------------------------------------|---------------------------------|-------------------------------------------------------------------------------------------------------|-------------|
| Park 2009 <sup>[46]</sup> | L: Blocked randomization             | U                                                         | L: Patients were blinded               | L: Investigators, study monitors were blinded | L: "All patients completed the study and there were no losses to follow up, no treatment withdrawals, no trial group changes and no major adverse events" | L                               | L: Protocol reported and authorized                                                                   | 4           |
| Shui 2014 <sup>[47]</sup> | L: Using a computer random generator | U                                                         | U                                      | U                                             | U                                                                                                                                                         | L                               | H: Incomplete statistical data of baseline evaluation; unclear source of methodology (symptom scores) | 2           |
| Tang 2006 <sup>[48]</sup> | L: Random number table               | H                                                         | U                                      | U                                             | U                                                                                                                                                         | L                               | U                                                                                                     | 2           |
| Wang 2012 <sup>[49]</sup> | L: Central Randomization             | L: Central Allocation (through text messages and e-mails) | U                                      | U                                             | U                                                                                                                                                         | L                               | U                                                                                                     | 4           |
| Wang 2015 <sup>[50]</sup> | L: Random number table               | H                                                         | U                                      | U                                             | U                                                                                                                                                         | H: Incomplete data of follow-up | H: Unclear source of methodology (effective assessment)                                               | 2           |

S1 Table CONT.

| Study                      | Random Sequence Generation | Allocation Concealment | Blinding of Participants and Personnel | Blinding of Outcome Assessment                             | Incomplete Outcome Data                                                                                               | Selective Reporting | Other bias                                                              | Jadad Score |
|----------------------------|----------------------------|------------------------|----------------------------------------|------------------------------------------------------------|-----------------------------------------------------------------------------------------------------------------------|---------------------|-------------------------------------------------------------------------|-------------|
| Xu 2015 <sup>[51]</sup>    | L: Random number table     | H                      | U                                      | U                                                          | U                                                                                                                     | L                   | H: Inclusion Criteria was lack of authority                             | 2           |
| Yang 2009 <sup>[52]</sup>  | L: Random number table     | H                      | U                                      | U                                                          | L: "No dropout in this study "                                                                                        | L                   | U                                                                       | 3           |
| Yu 2010 <sup>[53]</sup>    | L: Central Randomization   | L: Central Allocation  | U                                      | L: Outcome assessors and statistical analysts were blinded | L: 6/116 missing from acupuncture group; 4/119 missing from sham-acupuncture group; 4/119 missing from medicine group | L                   | L: Protocol reported and registered; specific quality control principle | 6           |
| Zhang 2009 <sup>[54]</sup> | L: Random number table     | H                      | U                                      | U                                                          | U: 2 missing before the trails without any probable reason reported                                                   | L                   | U                                                                       | 3           |
| Zhao 2015 <sup>[55]</sup>  | L: Random number table     | H                      | U                                      | U                                                          | U                                                                                                                     | L                   | U                                                                       | 2           |

\*L, "low risk" of bias; U, "unclear risk" of bias; H, "high risk" of bias. According to Cochrane Collaboration's tool for assessing risk of bias, bias of each item can be judged as one of the three levels-Low risk, Unclear risk and High risk.

**S2 Table. Comparisons across Related Systematic Reviews**

| Authors of Systematic Reviews | Inception Date | Types of Included Studies (numbers) | Numbers of Included studies | Countries of Included Trials | Quality Assessment                                       | Intervention                                       | Control                      | Reported Outcomes                                                                 | Conclusions                                                            |
|-------------------------------|----------------|-------------------------------------|-----------------------------|------------------------------|----------------------------------------------------------|----------------------------------------------------|------------------------------|-----------------------------------------------------------------------------------|------------------------------------------------------------------------|
| Zhu <sup>[62]</sup>           | 2007.3         | RCTs<br>Quasi-RCTs <sup>1</sup> (8) | 11                          | China                        | Simple approach method of Cochrane handbook <sup>2</sup> | MA<br>Moxibustion<br>PI<br>PCI<br>TENS             | M<br>HM                      | Ineffective rate<br>Symptom scores<br>Adverse effect                              | AT>M <sup>3</sup> ; PI>M; PCI<br>≈WM <sup>3</sup> ; MB≈M;<br>ACU+HM≈HM |
| Wu <sup>[60]</sup>            | Not mention    | RCTs<br>Quasi-RCTs (5)              | 16                          | China                        | Jadad Scale                                              | MA<br>EA<br>Moxibustion<br>MA+Moxibustion          | Prokinetics                  | Total effective rate                                                              | Acupuncture and moxibustion therapy>WM                                 |
| Leng <sup>[61]</sup>          | 2013.2.5       | RCTs<br>Quasi-RCTs (8)              | 15                          | China                        | Cochrane risk of bias tool                               | MA<br>EA<br>MA+M <sup>3</sup><br>EA+M<br>Finger AT | M                            | Total effective rate<br>Symptom scores<br>MTL<br>NDLQI<br>SF-36<br>Adverse effect | AT>WM<br>AT+WM>WM                                                      |
| Kim <sup>[58]</sup>           | 2013.8.20      | RCTs<br>Quasi-RCTs (8)              | 20                          | China<br>Korea<br>Indonesia  | Cochrane risk of bias tool                               | MA<br>Finger AT<br>MA+AA<br>MA+M                   | No treatment<br>Sham AT<br>M | Total effective rate<br>Symptom scores (VAS NDI)<br>Adverse effect                | AT (included Finger AT)>Sham<br>AT<br>≈WM                              |



S2 Table Cont.

| Authors of Systematic Reviews | Inception Date | Types of Included Studies (numbers) | Numbers of Included studies | Countries of Included Trials | Quality Assessment                                        | Intervention     | Control      | Reported Outcomes                                                                       | Conclusions         |
|-------------------------------|----------------|-------------------------------------|-----------------------------|------------------------------|-----------------------------------------------------------|------------------|--------------|-----------------------------------------------------------------------------------------|---------------------|
| Lan <sup>[59]</sup>           | 2012.2         | RCTs<br>Quasi-RCTs (2)              | 6                           | China<br>Korea               | Cochrane risk of bias tool<br>GRADE system                | MA<br>EA<br>MA+M | Sham AT<br>M | Symptom scores<br>Frequency of symptoms<br>NDI<br>SF-36<br>SAS<br>SDS<br>Adverse effect | AT>Sham AT<br>AT≈WM |
| Pang                          | 2015.12.31     | RCTs                                | 16                          | China<br>Korea               | Cochrane risk of bias tool<br>GRADE system<br>Jadad scale | MA<br>EA         | Sham AT<br>M | NDI (NDSI;<br>NDLQI)<br>Symptom scores<br>SF-36<br>Ineffective rate<br>Adverse effect   | AT>Sham AT<br>AT>WM |

Abbreviation : AT, acupuncture treatment; MA, manual acupuncture; EA, electroacupuncture; PI, point injection; PCI, point catgut implantation; TENS, transcutaneous electrical nerve stimulation; AA, auricular acupoints; M, medication; HM, herbal medicine.

1.Quasi-RCTs: 1) RCTs with quasi-random method of allocating participants to different interventions, such as alternation, date of birth, or case record number. 2) RCTs with insufficient randomized method (only with a brief statement such as “we randomly allocated” or “using a randomized design”).

2.Descriptive assessment with respect to four aspects: random sequence generation, allocation concealment, blinding of participants and personnel, blinding of outcome assessment, withdrawal.

3.”+” indicated “combined”; “>” means the efficacy of former is superior to the later; “≈” means no significant difference exists on the efficacy between the former and the later.
